# Supplementary material for: Bioactivities and Mode of Actions of Dibutyl Phthalates and Nocardamine from Streptomyces sp. H11809
Source: MDPI journal article supplement (doi:10.3390/molecules27072292), 2022-03-31
Supplement: s1 [file s1]

## Supplementary Materials

**Table S1.** Optimization of secondary metabolites production against *HsGSK-3 $\beta$*  from *Streptomyces* sp. H11809

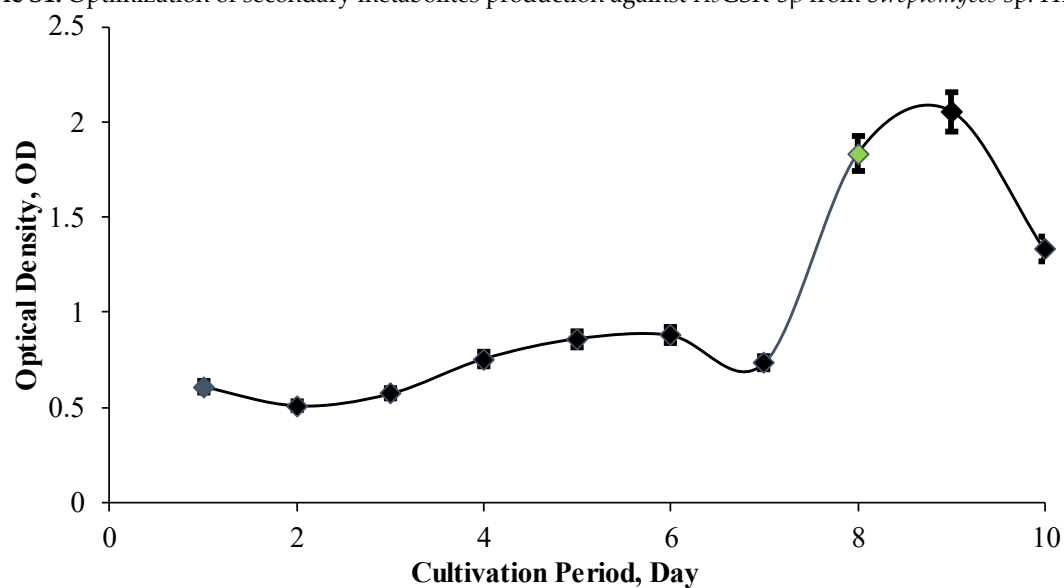

| The incubation period, day | Optical density, A | Inhibition of <i>HsGSK-3<math>\beta</math></i> , mm |             |
|----------------------------|--------------------|-----------------------------------------------------|-------------|
|                            |                    | 25 °C                                               | 37 °C       |
| 1                          | 0.6±0.007          | 0                                                   | 0           |
| 2                          | 0.5±0.003          | 0                                                   | 0           |
| 3                          | 0.6±0.007          | 0                                                   | 0           |
| 4                          | 0.80±0.003         | 0                                                   | 0           |
| 5                          | 0.9±0.019          | 8.0 ± 0.0                                           | 8.0 ± 0.0   |
| 6                          | 0.9±0.009          | 9.0 ± 0.0                                           | 11.7 ± 0.58 |
| 7                          | 0.7±0.005          | 11.0 ± 0.0                                          | 12.3 ± 0.58 |
| 8                          | 1.8±0.005          | 12.7 ± 0.58                                         | 16.0 ± 0.0  |
| 9                          | 2.1±0.0542         | 11.3 ± 0.58                                         | 14.3 ± 0.58 |

**Table S2** The comparison of  $^1\text{H}$ - and  $^{13}\text{C}$ -NMR of H11809-CCF8 and reported NMR analysis of DBP.

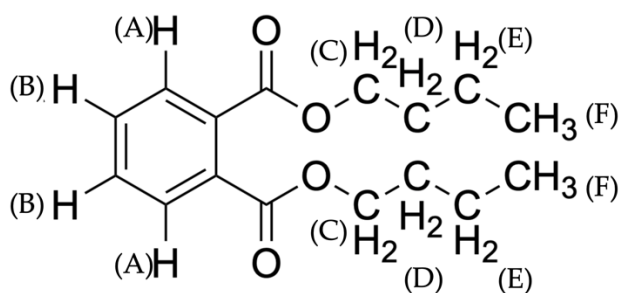

| Assignment | Shift (ppm)                      |                                        |
|------------|----------------------------------|----------------------------------------|
|            | $^1\text{H}$ -NMR of H11809-CCF8 | Reported $^1\text{H}$ -NMR of DBP [17] |
| A          | 7.71                             | 7.70                                   |
| B          | 7.54-7.51                        | 7.53                                   |
| C          | 4.30                             | 4.30                                   |
| D          | 1.74-1.69                        | 1.70                                   |
| E          | 1.44                             | 1.44                                   |
| F          | 0.96                             | 0.97                                   |

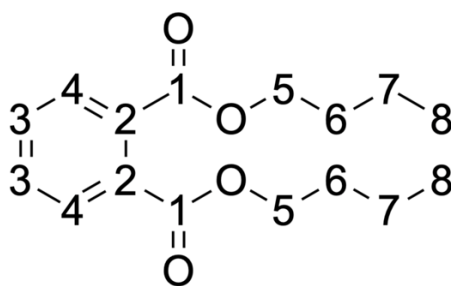

| Assignment | Shift (ppm)                         |                                           |
|------------|-------------------------------------|-------------------------------------------|
|            | $^{13}\text{C}$ -NMR of H11809-CCF8 | Reported $^{13}\text{C}$ -NMR of DBP [17] |
| 1          | 167.9                               | 167.7                                     |
| 2          | 132.5                               | 132.4                                     |
| 3          | 131.1                               | 131.0                                     |
| 4          | 129.0                               | 128.9                                     |
| 5          | 65.8                                | 65.52                                     |
| 6          | 30.8                                | 30.6                                      |
| 7          | 19.4                                | 19.2                                      |
| 8          | 13.9                                | 13.7                                      |

**Table S3.** The effect of Fe<sup>3+</sup> addition on antimalarial activity of nocardamine. Values above the bold lines indicated reduced >90% of nocardamine antimalarial effects as ≥12.5 μM ferric ions were added into the culture.

| [Fe <sup>3+</sup> ], μM<br>(16-dilution<br>points) | IR (%) of <i>Pf</i> 3D7 +<br>FeCl <sub>3</sub> | IR (%) of <i>Pf</i> 3D7 +<br>20 μM Nocardamine + FeCl <sub>3</sub> |
|----------------------------------------------------|------------------------------------------------|--------------------------------------------------------------------|
| 50                                                 | 89.6                                           | 97.8                                                               |
| 25                                                 | 89.8                                           | 93.9                                                               |
| 12.5                                               | 93.0                                           | 100.0                                                              |
| 6.25                                               | 89.9                                           | 10.2                                                               |
| 3.125                                              | 90.4                                           | 7.7                                                                |
| 1.563                                              | 90.4                                           | 8.2                                                                |
| 0.781                                              | 89.3                                           | 8.8                                                                |
| 0.391                                              | 98.7                                           | 9.0                                                                |
| 0.195                                              | 96.3                                           | 8.8                                                                |
| 0.098                                              | 91.9                                           | 8.1                                                                |
| 0.049                                              | 90.4                                           | 7.3                                                                |
| 0.024                                              | 90.1                                           | 7.5                                                                |
| 0.012                                              | 93.2                                           | 7.1                                                                |
| 0.006                                              | 95.1                                           | 7.1                                                                |
| 0.003                                              | 94.8                                           | 8.2                                                                |
| 0.002                                              | 100.0                                          | 9.4                                                                |

Note:- *Pf* 3D7 IC<sub>50</sub> of nocardamine is 1.5 μM. IR = Infection rate

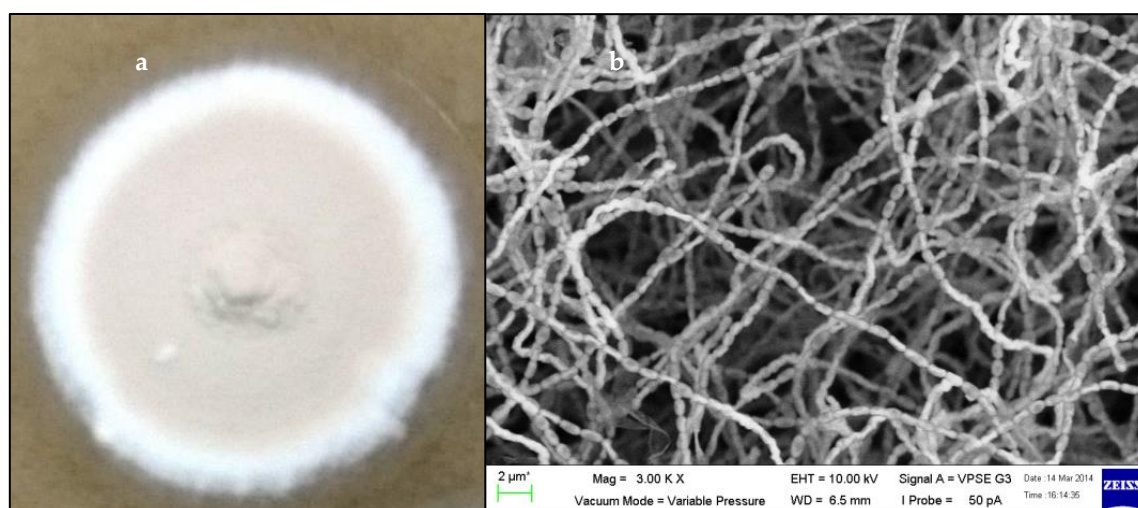

**Figure S1.** Morphology of *Streptomyces* sp. H11809. (a) *Streptomyces* sp. H11809 single colony grown for 14 days on OA. (b) Scanning electron micrograph showing spore chain morphology.

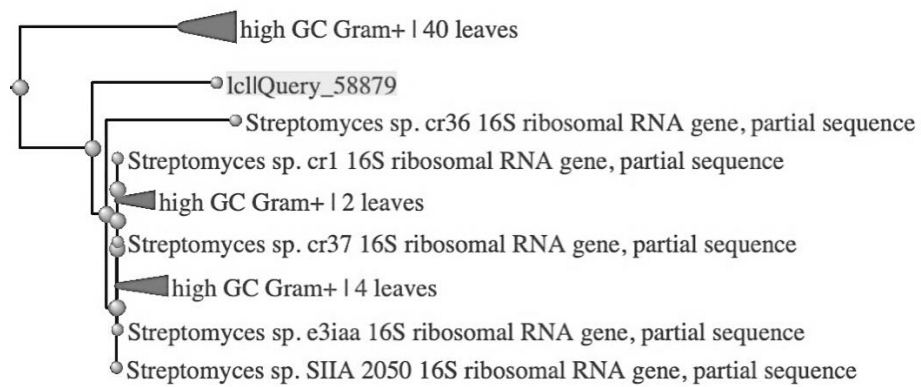

**Figure S2.** Phylogenetic tree of strain H11809. This strain is closely related to *Streptomyces* sp. such as *Streptomyces* sp. SIIA 2050 and *Streptomyces* sp. cr36.

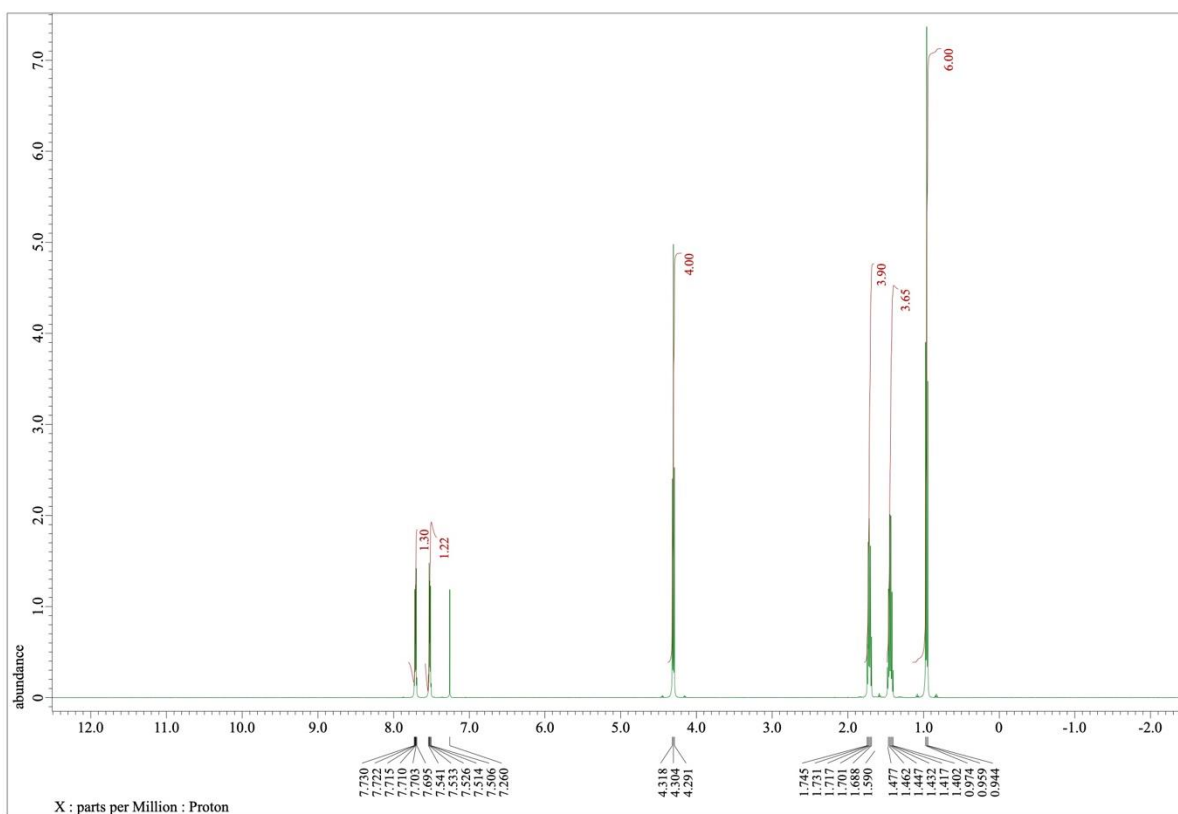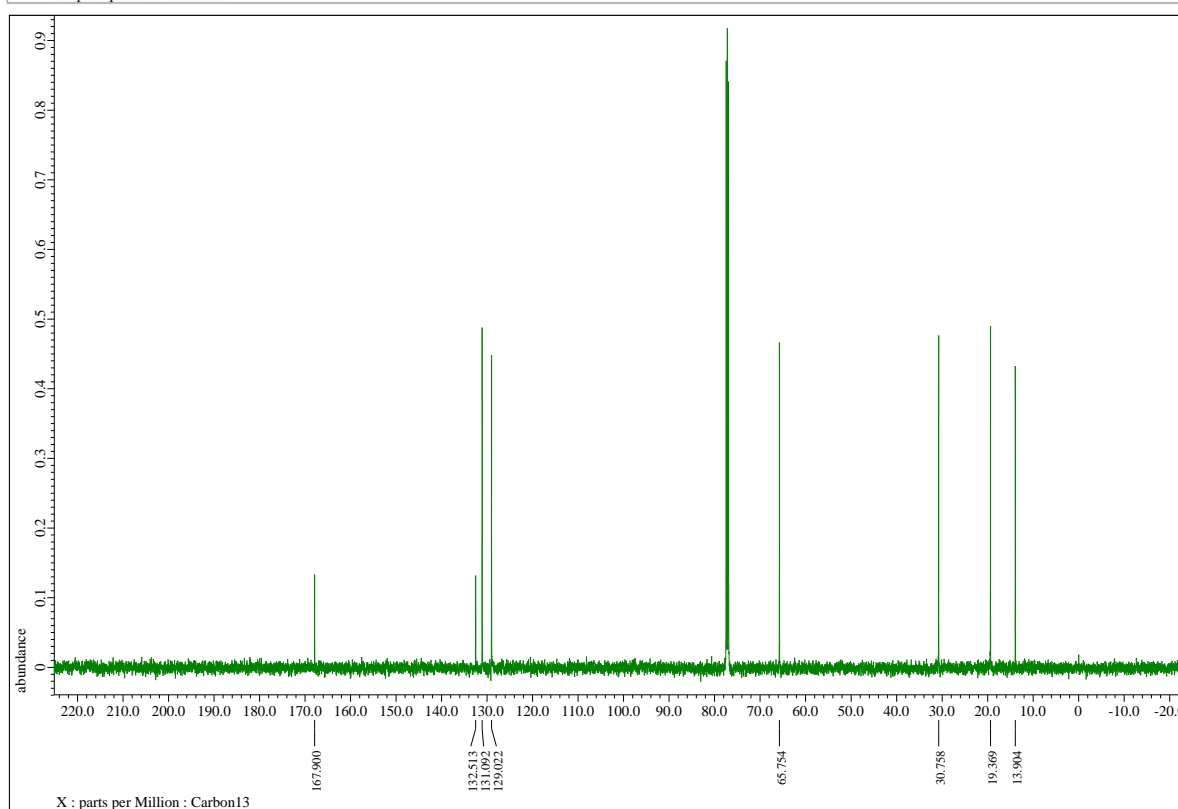

Figure S3. <sup>1</sup>H- and <sup>13</sup>C-NMR spectrum of H11809-CCF8.

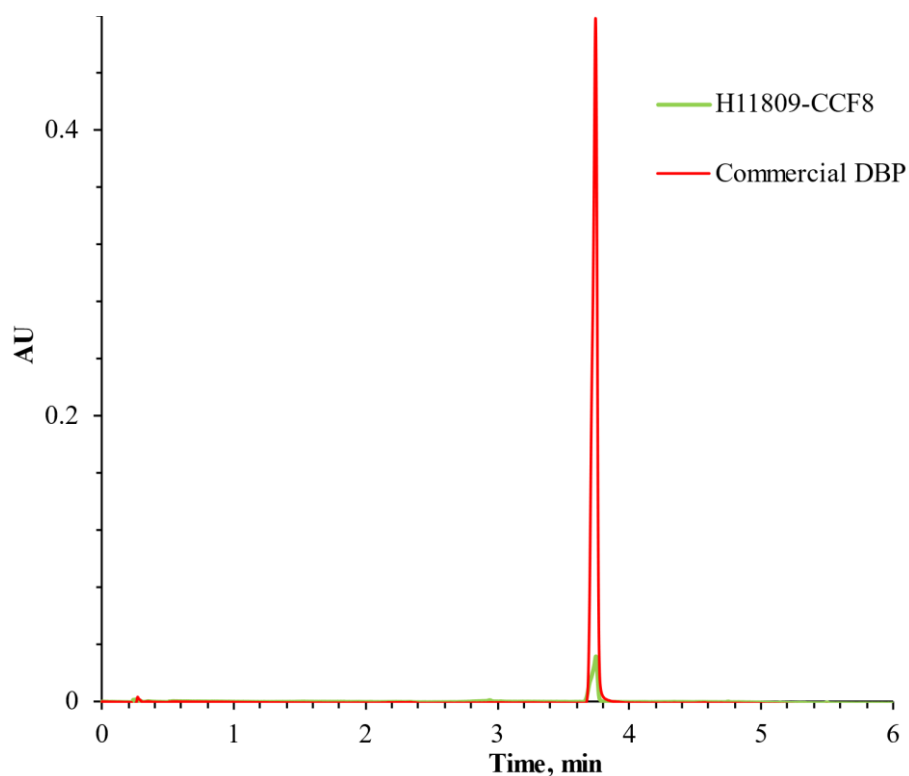

**Figure S4** UPLC chromatogram of H11809-CCF8 (green) and commercial DBP (red), 5  $\mu$ L (10  $\mu$ g/mL) of working solution injected into UPLC, and the chromatogram was viewed at 254 nm. Both compounds have similar RT (~3.7 min), hence confirming the presence of DBP in H11809-CCF8.

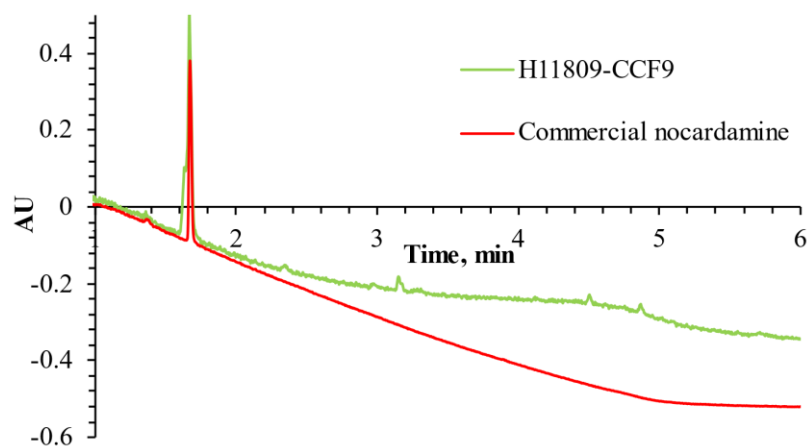

**Figure S5.** UPLC chromatogram of H11809-CCF9 (green) and commercial nocardamine (red), 5  $\mu$ L (10  $\mu$ g/mL) of working solution injected into UPLC, and the chromatogram was viewed at 200 nm. Both compounds have similar RT (~1.6 min), hence confirmed the presence of nocardamine in H11809-CCF9.

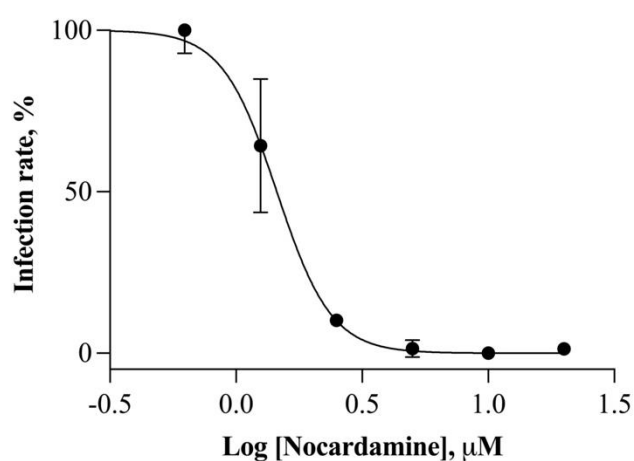

**Figure S6.** *PβD7* IC<sub>50</sub> determination of nocardamine (1.5  $\mu\text{M}$ ). The IC<sub>50</sub> graph was plotted with GraphPad prism.

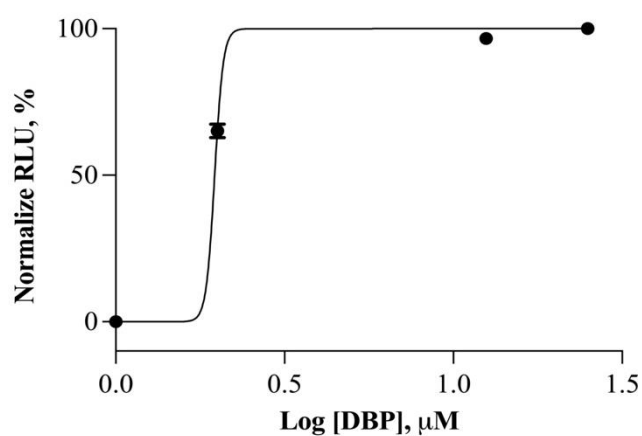

**Figure S7.** The IC<sub>50</sub> determination of DBP against *HsGSK-3β*. The IC<sub>50</sub> of DBP against *HsGSK-3β* was 2.0  $\mu\text{M}$ , a moderate *HsGSK-3β* inhibitor. The IC<sub>50</sub> graph was plotted with GraphPad prism.

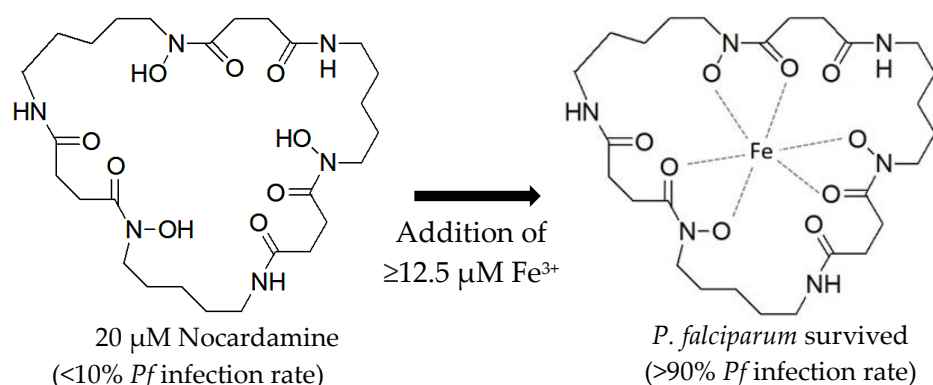

**Figure S8.** Suggested antimalarial MoA of nocardamine. The addition of  $\geq 12.5 \mu\text{M Fe}^{3+}$  reduced the efficiency of nocardamine by 90% against *Pf* 3D7, indicating *Pf* iron starvation as the antimalarial MoA of nocardamine.

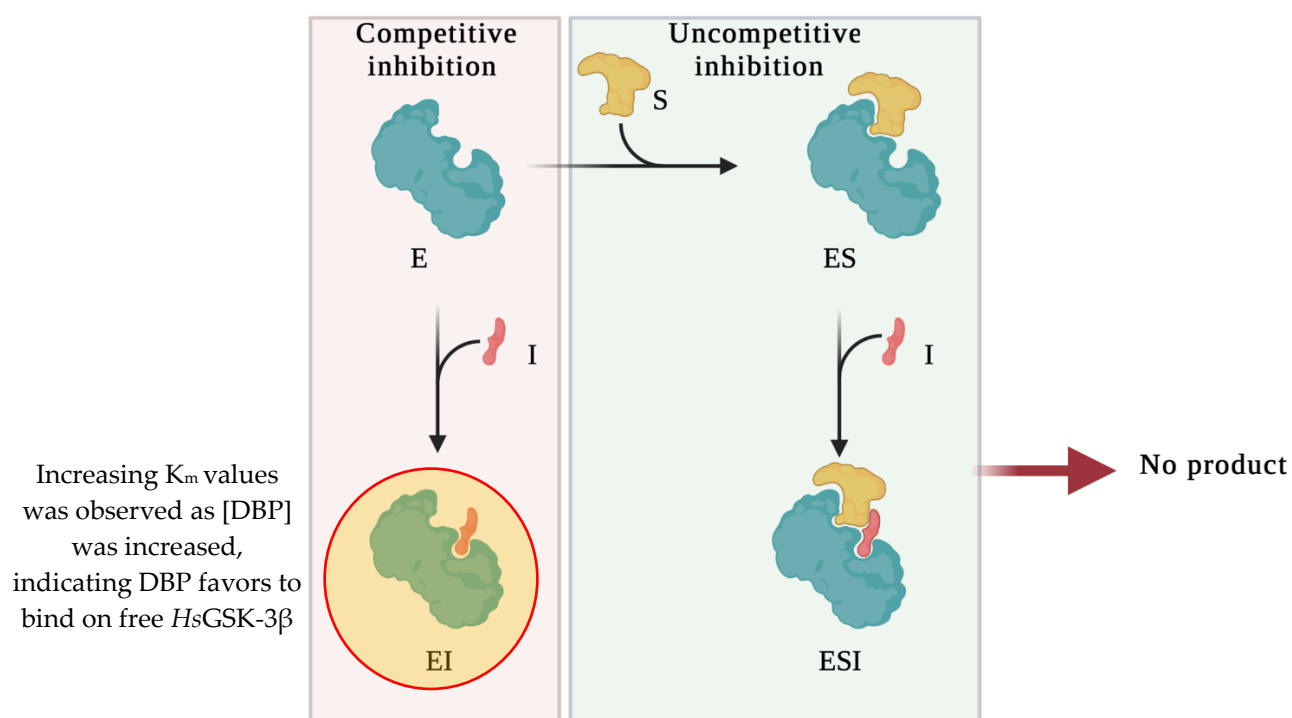

**Figure S9.** *HsGSK-3 $\beta$*  inhibition MoA by DBP (I), postulated based on  $K_m$  and  $V_{max}$  changes. DBP was indicated to inhibit *HsGSK-3 $\beta$*  via a mixed inhibition (a combination of competitive and uncompetitive inhibitions patterns). However, the increase of  $K_m$  values indicates that DBP favors/higher affinity to bind on free *HsGSK-3 $\beta$* /enzyme (E) than enzyme-substrate complexes (ES). E = Enzyme, S = Substrate, I = Inhibitor, ES = Enzyme-Substrate complex, EI = Enzyme-Inhibitor complex, ESI = Enzyme-Substrate-Inhibitor complex. Created with BioRender.com.
